# Supplementary material
Source: Springer Nature journal article supplement (https://www.springermedizin.de/resource/supplementary/12943_2012_1031_MOESM8_ESM.pdf/9552130)

**A**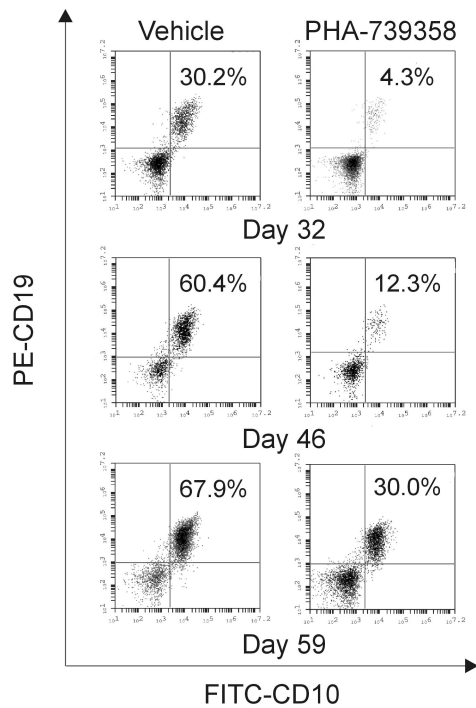**B**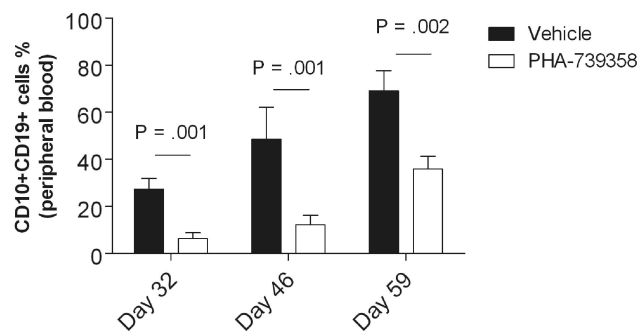**C**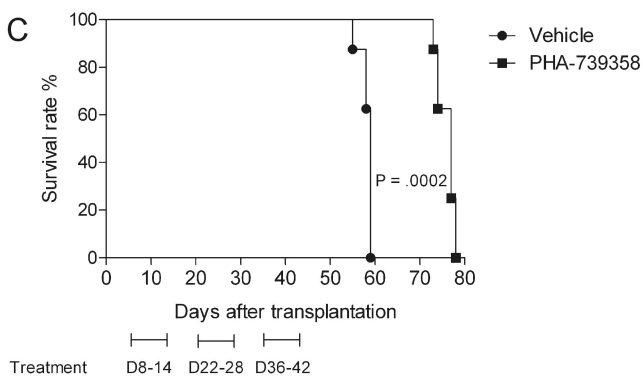**D**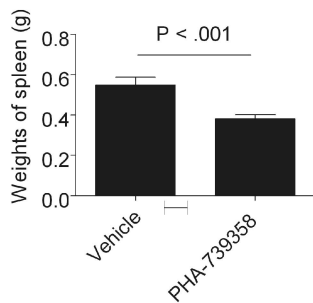**E**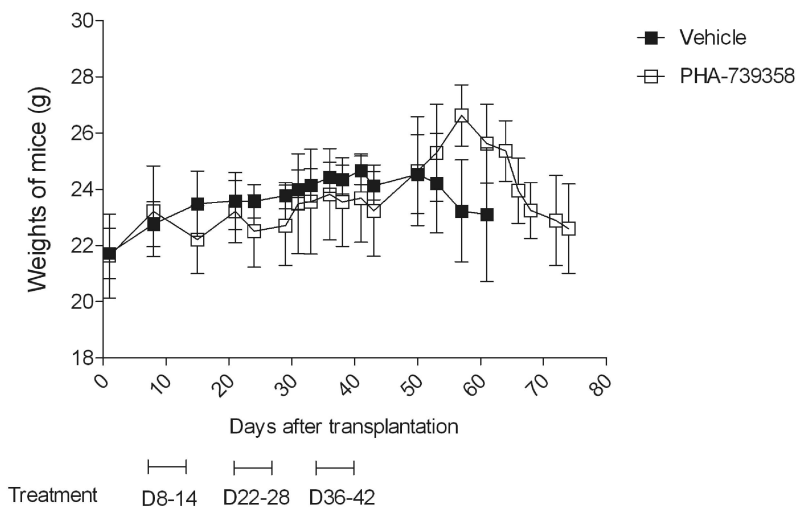

Supplement: MOESM8 [file 9552130]
